# Supplementary material for: Solvent and electrolyte effects on Ni(PR2NR′2)2-catalyzed electrochemical oxidation of hydrogen
Source: Royal Society of Chemistry journal article supplement (doi:10.1039/c4cc00295d), 2014-01-01
Supplement: c4cc00295d1.pdf [file c4cc00295d1.pdf]

Electronic Supplementary Information  
for

**Solvent and Electrolyte Effects on  $\text{Ni}(\text{P}^{\text{R}}_2\text{N}^{\text{R}'}_2)_2$ -Catalyzed Electrochemical  
Oxidation of Hydrogen**

*Ryan M. Stolley, Jonathan M. Darmon, and Monte L. Helm\**

Correspondence to [monte.helm@pnnl.gov](mailto:monte.helm@pnnl.gov)

**PDF file includes:**

Table of Contents

Materials and Methods

## Table of Contents

|                                                                                                                                                                           |     |
|---------------------------------------------------------------------------------------------------------------------------------------------------------------------------|-----|
| <b>Materials and Methods</b>                                                                                                                                              | S3  |
| Materials                                                                                                                                                                 | S3  |
| Instrumentation                                                                                                                                                           | S3  |
| <b>Figure S1.</b> Cyclic voltammograms of fluorobenzene and THF solutions of $\text{Ni}(\text{PCy}_2\text{N}^{\text{Bn}})_2$ as a function of supporting electrolyte.     | S4  |
| <b>Figure S2.</b> Cyclic voltammograms of fluorobenzene and THF solutions of $\text{Ni}(\text{PCy}_2\text{N}^{\text{tBu}})_2$ as a function of supporting electrolyte.    | S5  |
| <b>Figure S3.</b> Plot of the peak current ( $i_p$ ) versus (scan rate) <sup>1/2</sup> for $\text{Ni}(\text{PCy}_2\text{N}^{\text{Bn}})_2$ in fluorobenzene.              | S6  |
| <b>Figure S4.</b> Plot of the peak current ( $i_p$ ) versus (scan rate) <sup>1/2</sup> for $\text{Ni}(\text{PCy}_2\text{N}^{\text{Bn}})_2$ in THF.                        | S7  |
| <b>Figure S5.</b> Plot of the peak current ( $i_p$ ) versus (scan rate) <sup>1/2</sup> for $\text{Ni}(\text{PCy}_2\text{N}^{\text{Bn}})_2$ in PhCN.                       | S8  |
| <b>Figure S6.</b> Plot of the peak current ( $i_p$ ) versus (scan rate) <sup>1/2</sup> for $\text{Ni}(\text{PCy}_2\text{N}^{\text{tBu}})_2$ in fluorobenzene.             | S9  |
| <b>Figure S7.</b> Plot of the peak current ( $i_p$ ) versus (scan rate) <sup>1/2</sup> for $\text{Ni}(\text{PCy}_2\text{N}^{\text{tBu}})_2$ in THF.                       | S10 |
| <b>Figure S8.</b> Identification of variables needed to calculate $k_{\text{obs}}$ .                                                                                      | S11 |
| <b>Figure S9.</b> Cyclic voltammograms of $\text{Ni}(\text{PCy}_2\text{N}^{\text{Bn}})_2$ in fluorobenzene upon addition of $n\text{BuNH}_2$ .                            | S12 |
| <b>Figure S10.</b> Cyclic voltammograms of $\text{Ni}(\text{PCy}_2\text{N}^{\text{Bn}})_2$ in THF upon addition of $n\text{BuNH}_2$ .                                     | S13 |
| <b>Figure S11.</b> Cyclic voltammograms of $\text{Ni}(\text{PCy}_2\text{N}^{\text{Bn}})_2$ in PhCN upon addition of $n\text{BuNH}_2$ .                                    | S14 |
| <b>Figure S12.</b> Cyclic voltammograms of $\text{Ni}(\text{PCy}_2\text{N}^{\text{Bn}})_2$ as a function of scan rate in THF with $n\text{BuNH}_2$ .                      | S15 |
| <b>Figure S13.</b> Cyclic voltammograms of $\text{Ni}(\text{PCy}_2\text{N}^{\text{tBu}})_2$ in fluorobenzene upon addition of $n\text{BuNH}_2$ .                          | S16 |
| <b>Figure S14.</b> Cyclic voltammograms of $\text{Ni}(\text{PCy}_2\text{N}^{\text{tBu}})_2$ in THF upon addition of $n\text{BuNH}_2$ .                                    | S17 |
| <b>Figure S15.</b> Plot of the catalytic current ( $i_{\text{cat}}$ ) versus the concentration of $n\text{BuNH}_2$ for $\text{Ni}(\text{PCy}_2\text{N}^{\text{Bn}})_2$ .  | S18 |
| <b>Figure S16.</b> Plot of the catalytic current ( $i_{\text{cat}}$ ) versus the concentration of $n\text{BuNH}_2$ for $\text{Ni}(\text{PCy}_2\text{N}^{\text{tBu}})_2$ . | S19 |
| <b>References</b>                                                                                                                                                         | S20 |

## Materials and Methods

### Materials

All manipulations were carried out using standard vacuum line, Schlenk and inert atmosphere glovebox techniques. Solvents were purified by passage through neutral alumina using an Innovative Technology, Inc., PureSolv™ solvent purification system. Water was dispensed from a Millipore MilliQ purifier ( $\rho = 18.2 \text{ M}\Omega\cdot\text{cm}$ ) and was degassed using three freeze-pump-thaw cycles prior to use. All amines used for electrocatalysis were dried over KOH or  $\text{CaH}_2$ , degassed, distilled under vacuum, and stored in a nitrogen-filled glovebox. Both  $\text{Ni}(\text{PCy}_2\text{N}^{\text{Bn}})_2$  (1) and  $\text{Ni}(\text{PCy}_2\text{N}^{\text{tBu}})_2$  (2) were prepared using literature procedures.

### Instrumentation

All electrochemical procedures were conducted at ambient temperature, 23 °C, under dinitrogen using either standard Schlenk conditions or a Vacuum Atmospheres drybox. A standard three-electrode configuration was employed in conjunction with a CH Instruments potentiostat interfaced to a computer with CH Instruments 700 D software. All voltammetric scans were recorded using glassy-carbon working electrode disks of 1 mm diameter (Cypress Systems EE040). A glassy-carbon rod (Structure Probe, Inc.) was used as the auxiliary electrode. A platinum wire (Alfa-Aesar) suspended in a solution of the electrolyte and separated from the analyte solution by a Vycor frit (CH Instruments 112) served as a pseudo-reference electrode. All glassware for electrochemical experiments was oven dried overnight and allowed to cool to room temperature before use.  $[\text{Cp}^*\text{Co}][\text{PF}_6]$  and  $[\text{Cp}_2\text{Co}][\text{PF}_6]$  were used as an internal standard, and all potentials reported within this work are referenced to the ferrocenium/ferrocene couple at 0.00 V. Bases were measured and transferred to electrochemical solutions via gas-tight syringes.

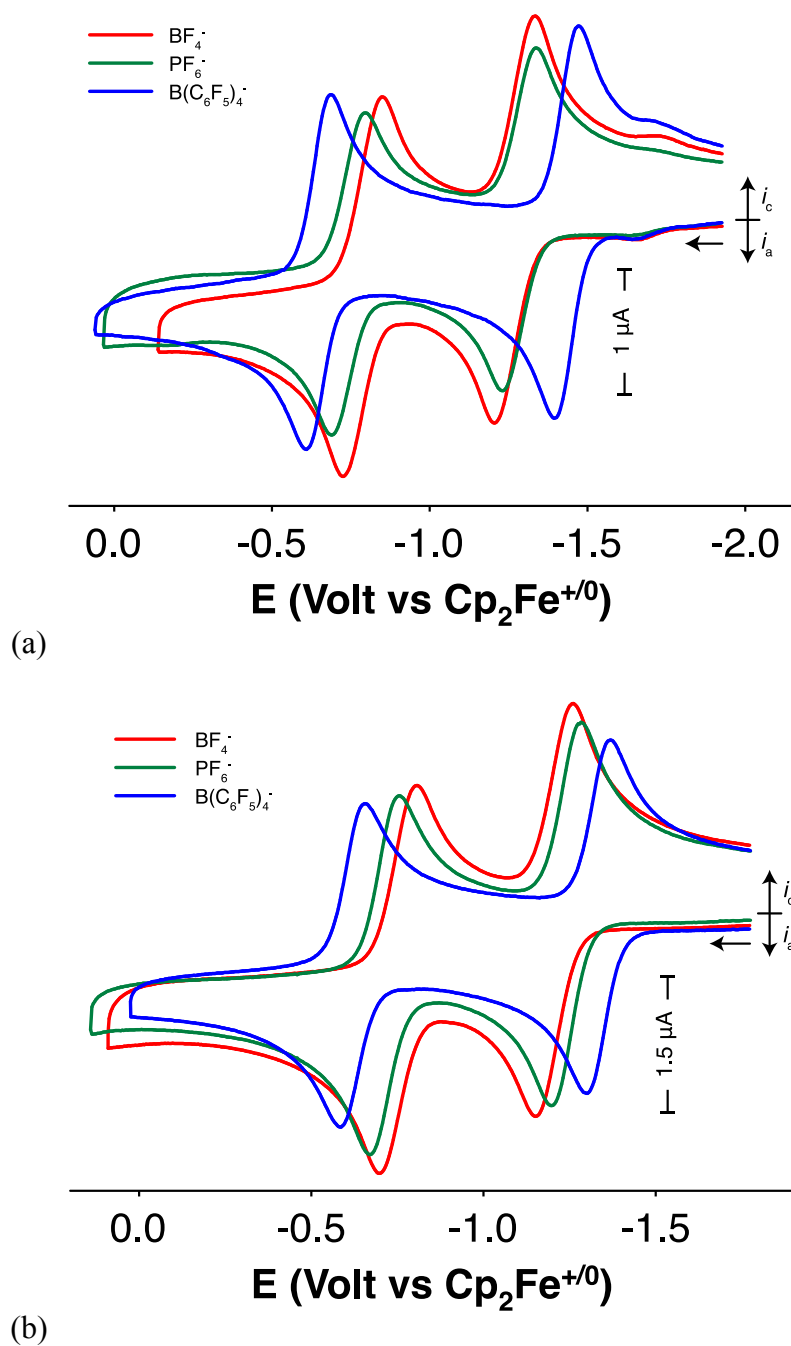

**Figure S1.** Cyclic voltammograms of a (a) fluorobenzene and (b) THF solution of  $\text{Ni}(\text{PCy}_2\text{NBn}_2)_2$  utilizing  $[\text{nBu}_4\text{N}][\text{BF}_4]$  (red),  $[\text{nBu}_4\text{N}][\text{PF}_6]$  (green), and  $[\text{nBu}_4\text{N}][\text{B}(\text{C}_6\text{F}_5)_4]$  (blue) as the supporting electrolyte. Conditions: 0.8 mM [Ni], 0.2 M electrolyte, **scan rate**. Potentials are referenced to  $\text{Cp}_2\text{Fe}^{+/0}$ .

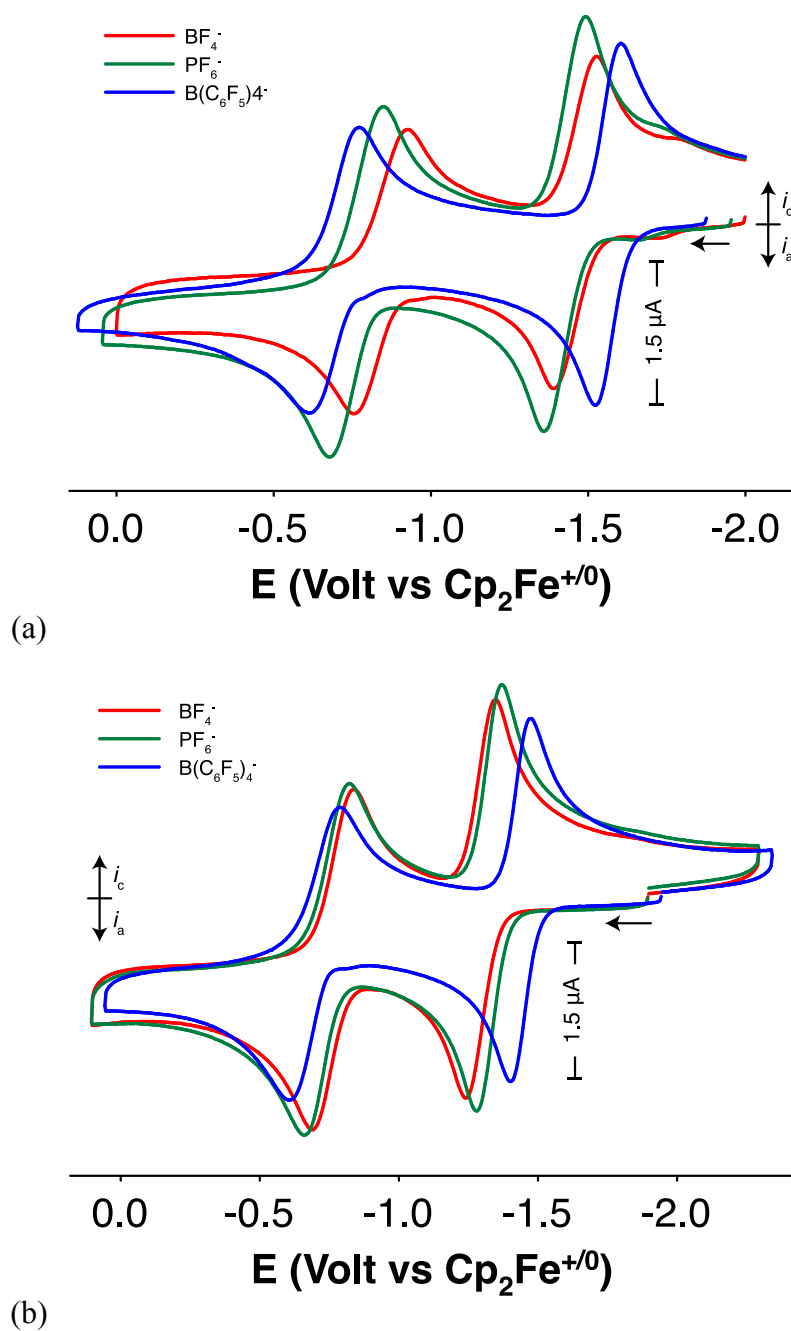

**Figure S2.** Cyclic voltammograms of a (a) fluorobenzene and (b) THF solution of  $\text{Ni}(\text{PCy}_2\text{N}^t\text{Bu}_2)_2$  utilizing  $[\text{Bu}_4\text{N}][\text{BF}_4]$  (red),  $[\text{Bu}_4\text{N}][\text{PF}_6]$  (green), and  $[\text{Bu}_4\text{N}][\text{B}(\text{C}_6\text{F}_5)_4]$  (blue) as the supporting electrolyte. Conditions: 0.8 mM  $[\text{Ni}]$ , 0.2 M electrolyte, **scan rate**. Potentials are referenced to  $\text{Cp}_2\text{Fe}^{+/0}$ .

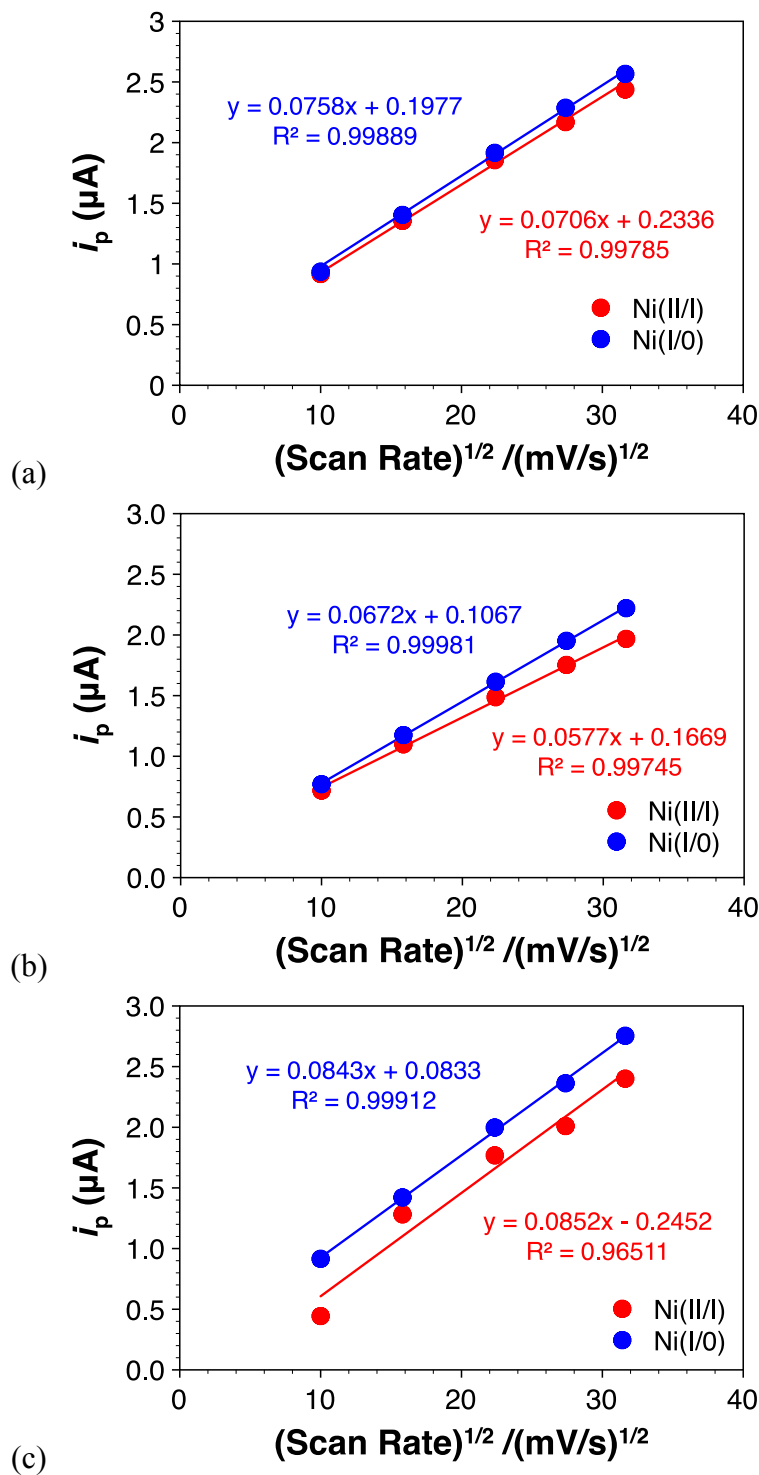

**Figure S3.** Plot of the peak current ( $i_p$ ) for the Ni(II/I) and Ni(I/O) redox couples of  $\text{Ni}(\text{P}^{\text{Cy}}_2\text{N}^{\text{Bn}}_2)_2$  versus the square root of the scan rate in fluorobenzene solution using (a)  $[\text{nBu}_4\text{N}][\text{BF}_4]$ , (b)  $[\text{nBu}_4\text{N}][\text{PF}_6]$ , and (c)  $[\text{nBu}_4\text{N}][\text{B}(\text{C}_6\text{F}_5)_4]$  as the supporting electrolyte. Conditions: 0.8 mM  $[\text{Ni}]$ , 0.2 M electrolyte.

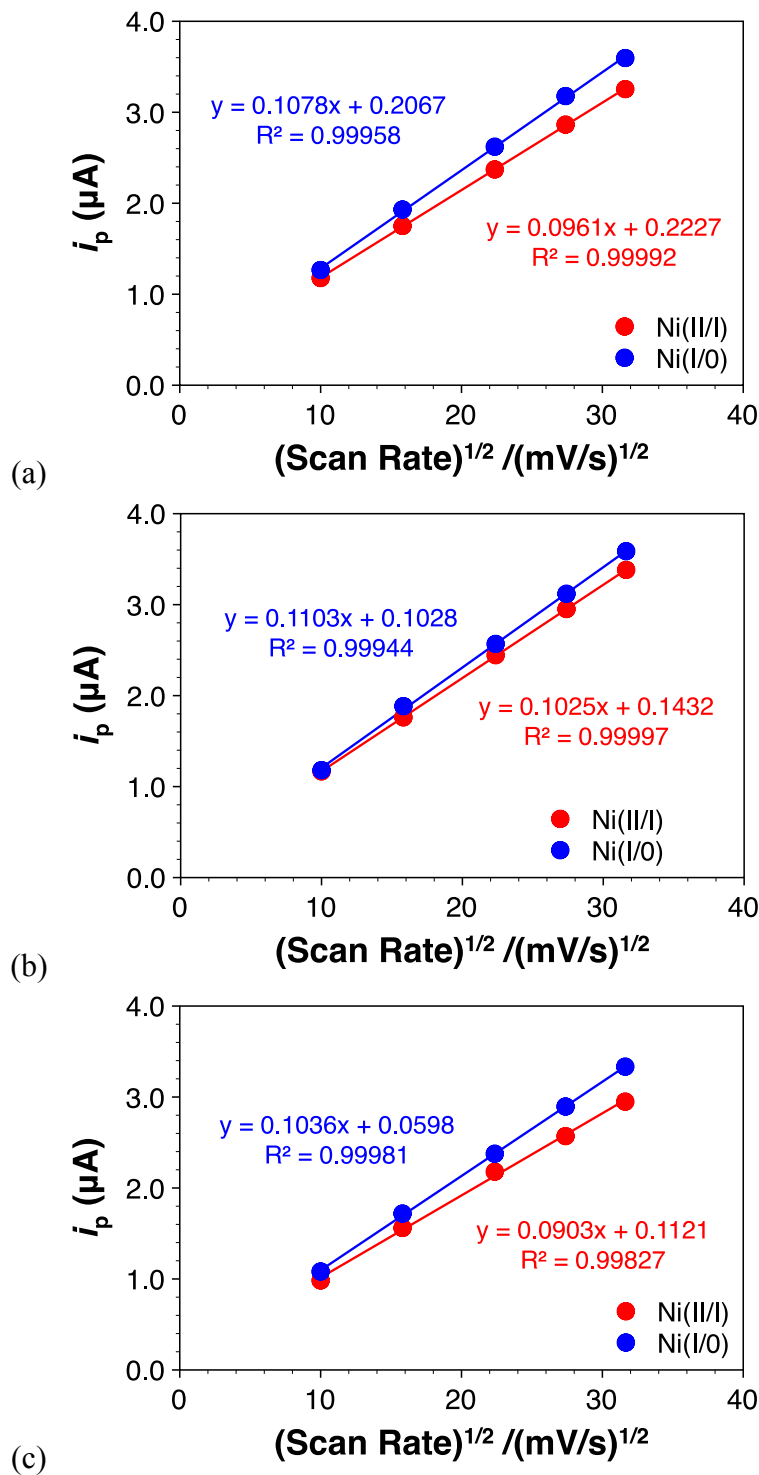

**Figure S4.** Plot of the peak current ( $i_p$ ) for the Ni(II/I) and Ni(I/O) redox couples of  $\text{Ni}(\text{PCy}_2\text{N}^{\text{Bn}})_2$  versus the square root of the scan rate in THF solution using (a)  $[\text{nBu}_4\text{N}][\text{BF}_4]$ , (b)  $[\text{nBu}_4\text{N}][\text{PF}_6]$ , and (c)  $[\text{nBu}_4\text{N}][\text{B}(\text{C}_6\text{F}_5)_4]$  as the supporting electrolyte. Conditions: 0.8 mM  $[\text{Ni}]$ , 0.2 M electrolyte.

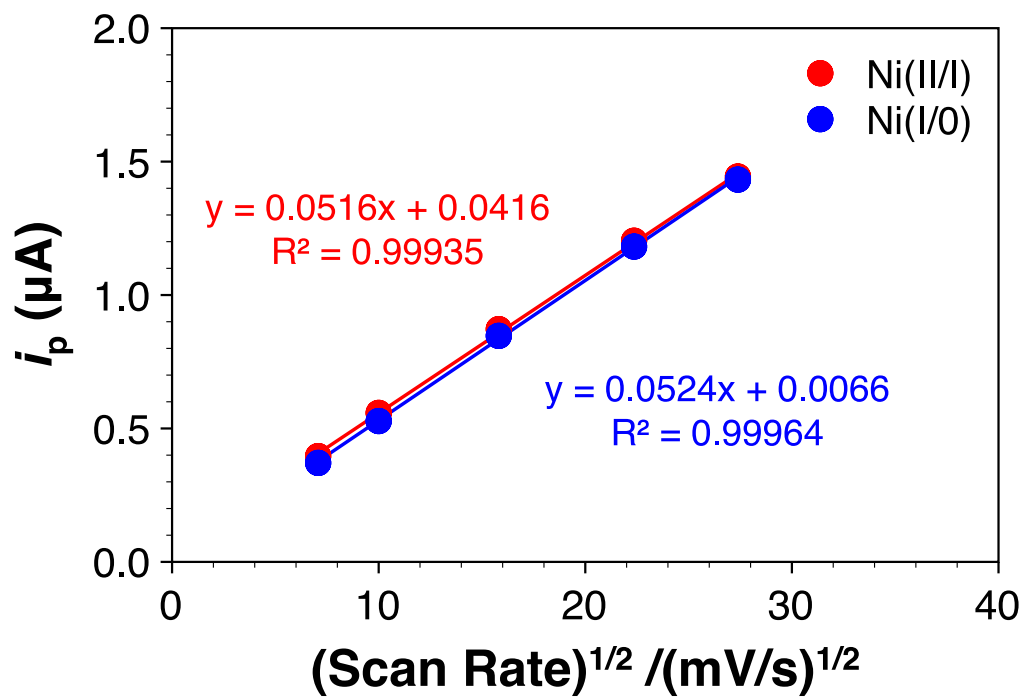

**Figure S5.** Plot of the peak current ( $i_p$ ) for the Ni(II/I) and Ni(I/0) redox couples of  $\text{Ni}(\text{P}^{\text{Cy}}_2\text{N}^{\text{Bn}}_2)_2$  versus the square root of the scan rate in benzonitrile solution using  $[\text{nBu}_4\text{N}][\text{PF}_6]$  as the supporting electrolyte. Conditions: 0.8 mM  $[\text{Ni}]$ , 0.2 M electrolyte.

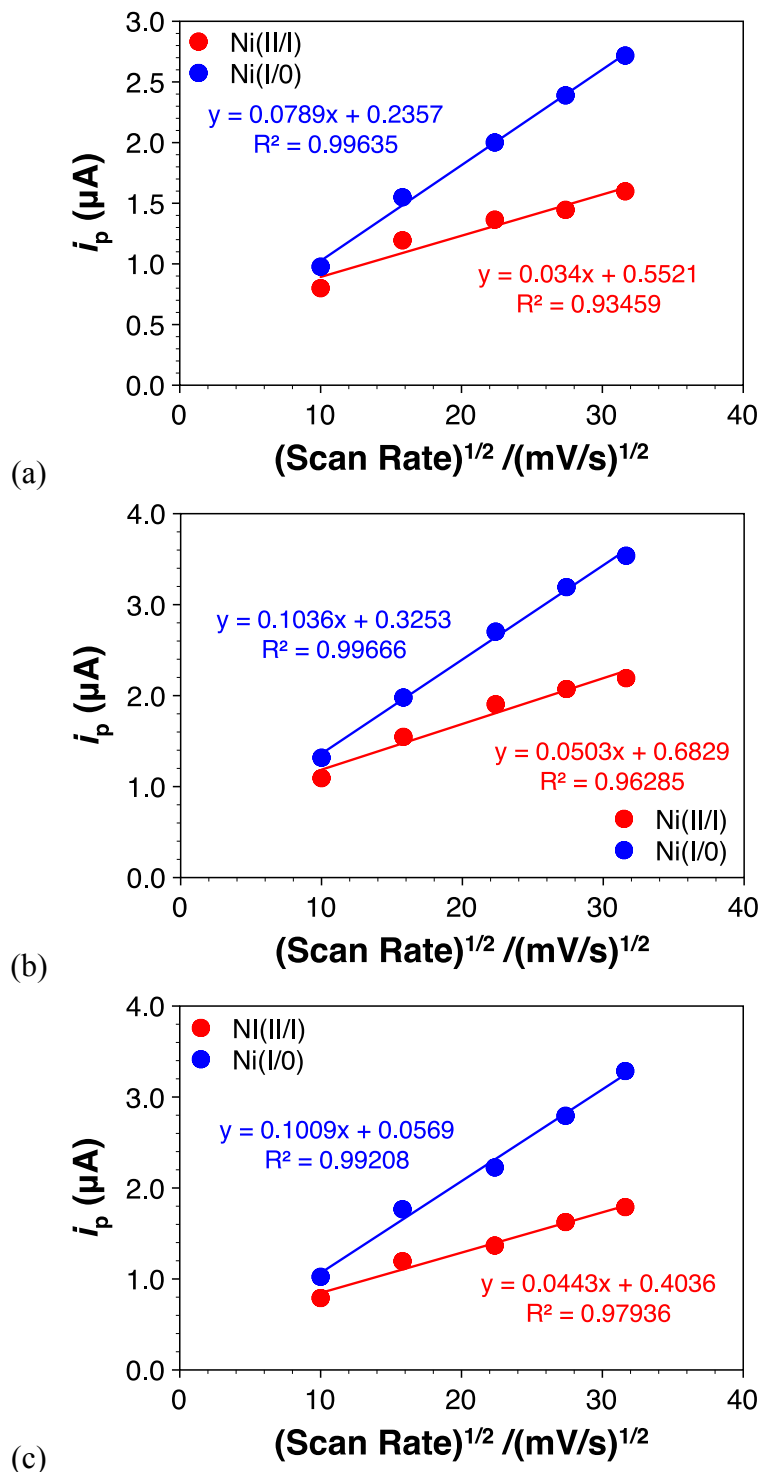

**Figure S6.** Plot of the peak current ( $i_p$ ) for the  $\text{Ni(II/I)}$  and  $\text{Ni(I/O)}$  redox couples of  $\text{Ni}(\text{PCy}_2\text{N}^{\text{tBu}})_2$  versus the square root of the scan rate in fluorobenzene solution using (a)  $[\text{nBu}_4\text{N}][\text{BF}_4]$ , (b)  $[\text{nBu}_4\text{N}][\text{PF}_6]$ , and (c)  $[\text{nBu}_4\text{N}][\text{B}(\text{C}_6\text{F}_5)_4]$  as the supporting electrolyte. Conditions: 0.8 mM  $[\text{Ni}]$ , 0.2 M electrolyte.

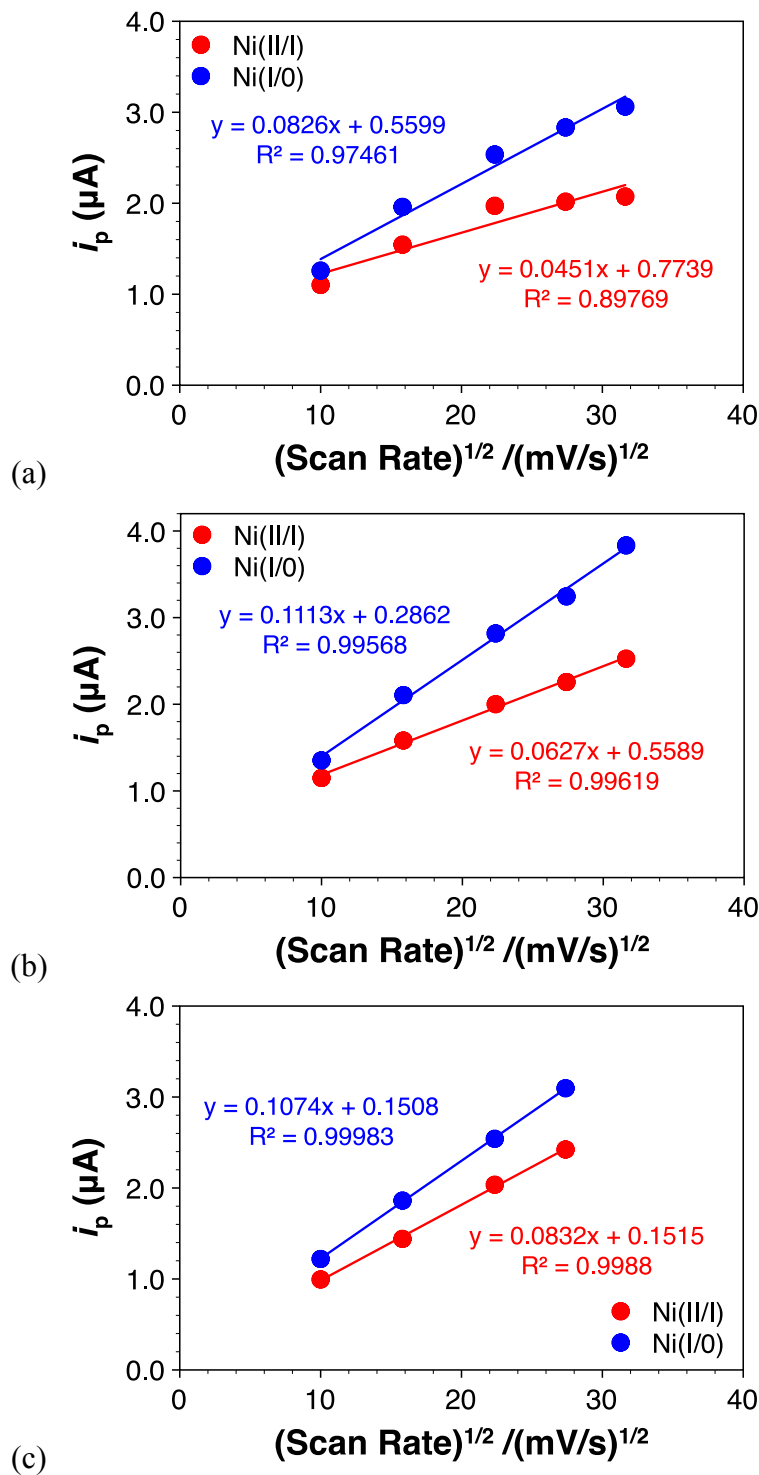

**Figure S7.** Plot of the peak current ( $i_p$ ) for the  $\text{Ni(II/I)}$  and  $\text{Ni(I/O)}$  redox couples of  $\text{Ni}(\text{PCy}_2\text{N}^t\text{Bu}_2)_2$  versus the square root of the scan rate in THF solution using (a)  $[\text{nBu}_4\text{N}][\text{BF}_4]$ , (b)  $[\text{nBu}_4\text{N}][\text{PF}_6]$ , and (c)  $[\text{nBu}_4\text{N}][\text{B}(\text{C}_6\text{F}_5)_4]$  as the supporting electrolyte. Conditions: 0.8 mM  $[\text{Ni}]$ , 0.2 M electrolyte.

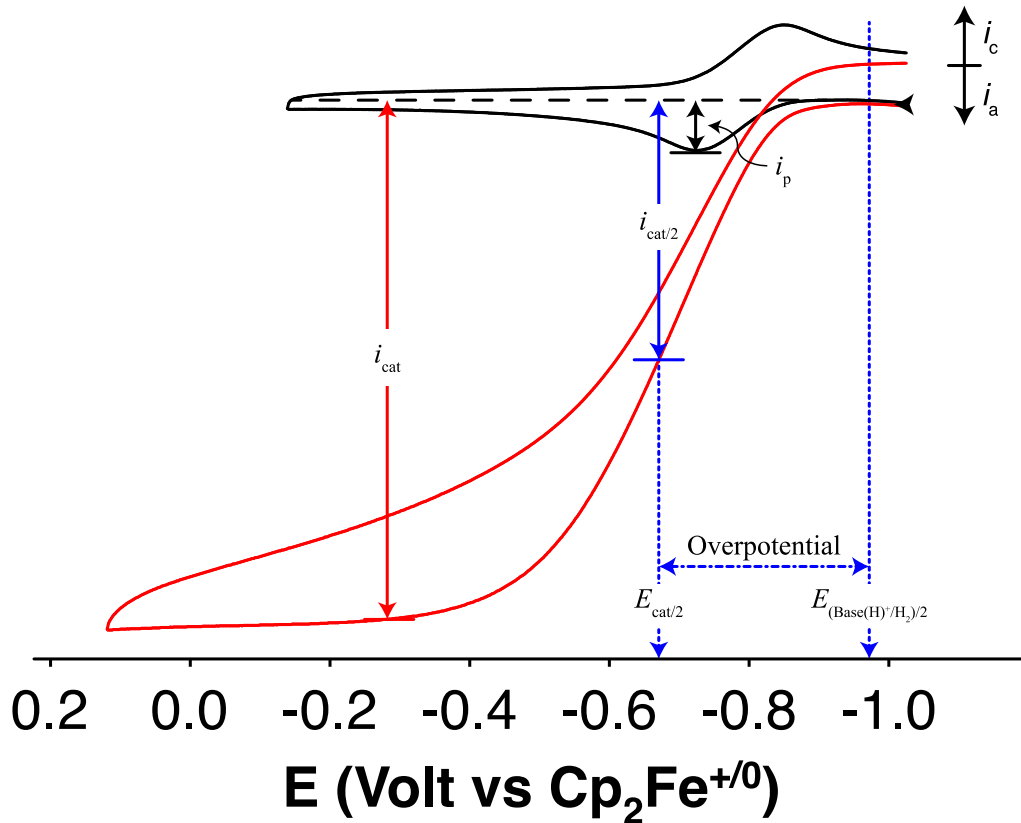

**Figure S8.** Cyclic voltammograms of a fluorobenzene solution of  $\text{Ni}(\text{PCy}_2\text{NBn}_2)_2$  (black) and subsequent current enhancement upon addition of 55 mM  $n\text{BuNH}_2$  (red).

#### Determination of turnover frequency ( $k_{\text{obs}}$ ):

Turnover frequencies ( $k_{\text{obs}}$ ) were determined from the ratio of  $i_{\text{cat}}/i_p$  using eq. 1, where  $n$  is the number of electrons (2 for  $\text{H}_2$  oxidation),  $R$  is the gas constant ( $8.314 \text{ J K}^{-1} \text{ mol}^{-1}$ ),  $F$  is Faraday's constant ( $9.65 \times 10^4 \text{ C/mol}$ ),  $T$  is the temperature (298 K), and  $\nu$  is the scan rate in V/s. The equation was simplified for hydrogen oxidation in eq. 2.

$$k_{\text{obs}} = \left(\frac{0.4463}{n}\right)^2 \cdot \left(\frac{F\nu}{RT}\right) \cdot \left(\frac{i_{\text{cat}}}{i_p}\right)^2 \quad (\text{eq. 1})$$

$$k_{\text{obs}} = 1.94 \text{ V}^{-1} \cdot \nu \cdot \left(\frac{i_{\text{cat}}}{i_p}\right)^2 \quad (\text{eq. 2})$$



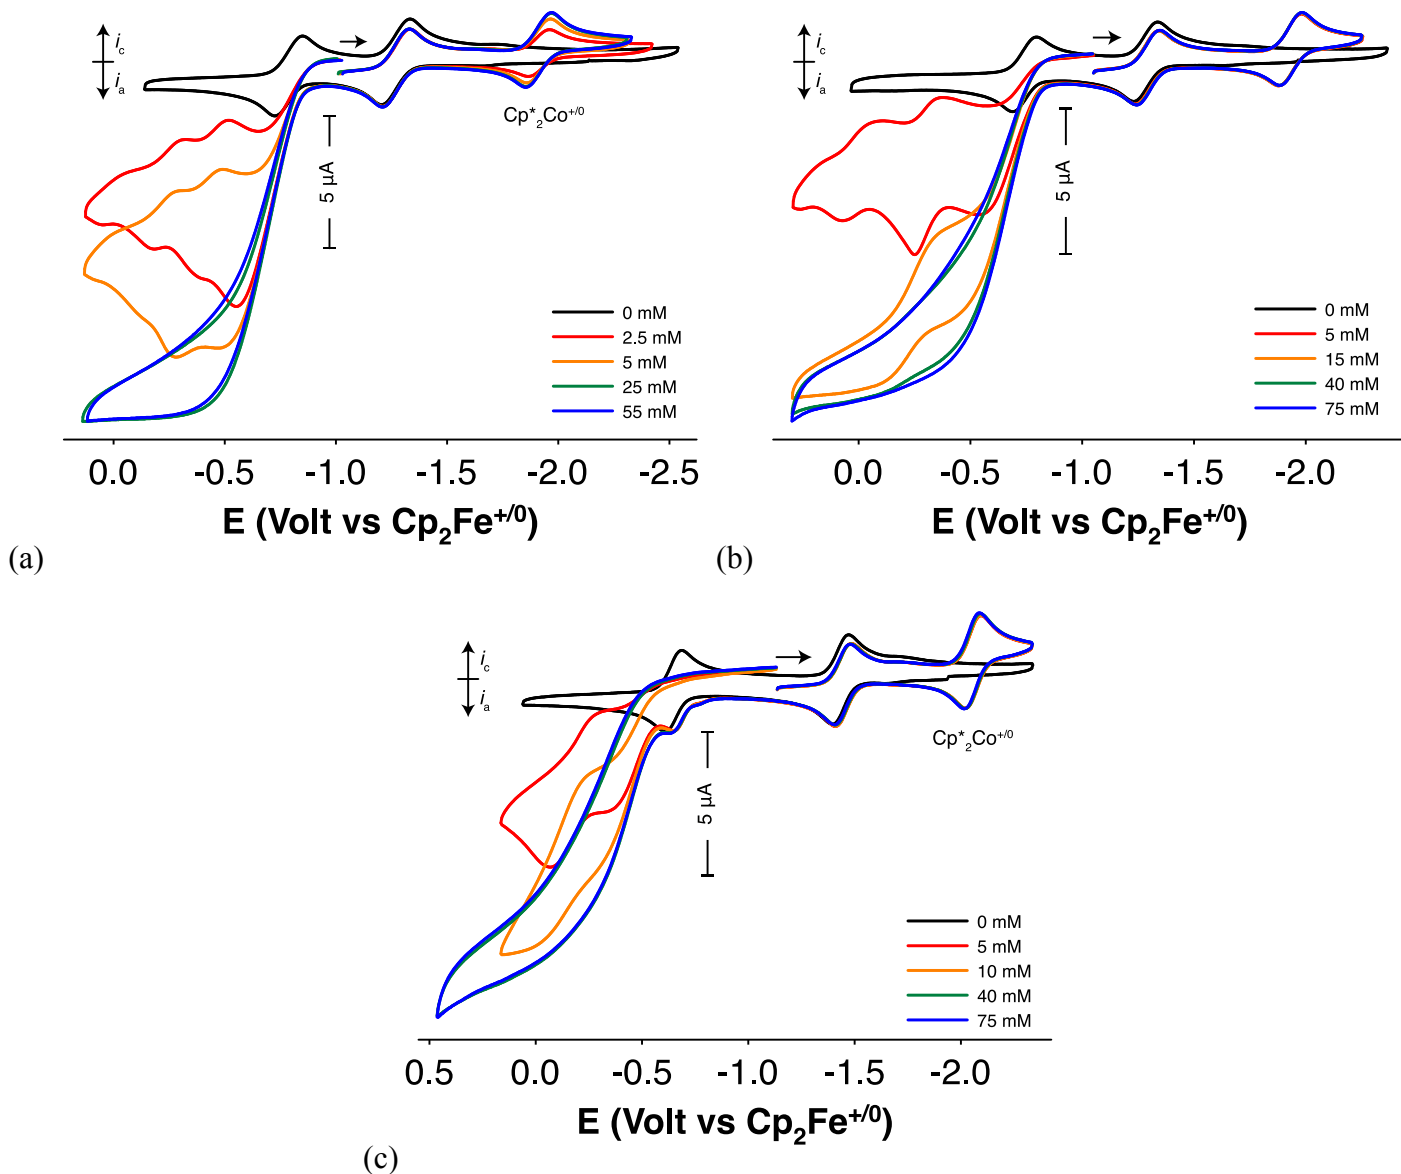

**Figure S9.** Cyclic voltammograms of a fluorobenzene solution of  $\text{Ni}(\text{PCy}_2\text{NBn}_2)_2$  upon addition of  $n\text{BuNH}_2$  using (a)  $[\text{nBu}_4\text{N}][\text{BF}_4]$ , (b)  $[\text{nBu}_4\text{N}][\text{PF}_6]$ , and (c)  $[\text{nBu}_4\text{N}][\text{B}(\text{C}_6\text{F}_5)_4]$  as the supporting electrolyte. Conditions: 0.8 mM  $[\text{Ni}]$ , 0.2 M electrolyte, 250 mV/s. Potentials are referenced to  $\text{Cp}_2\text{Fe}^{+/0}$ .

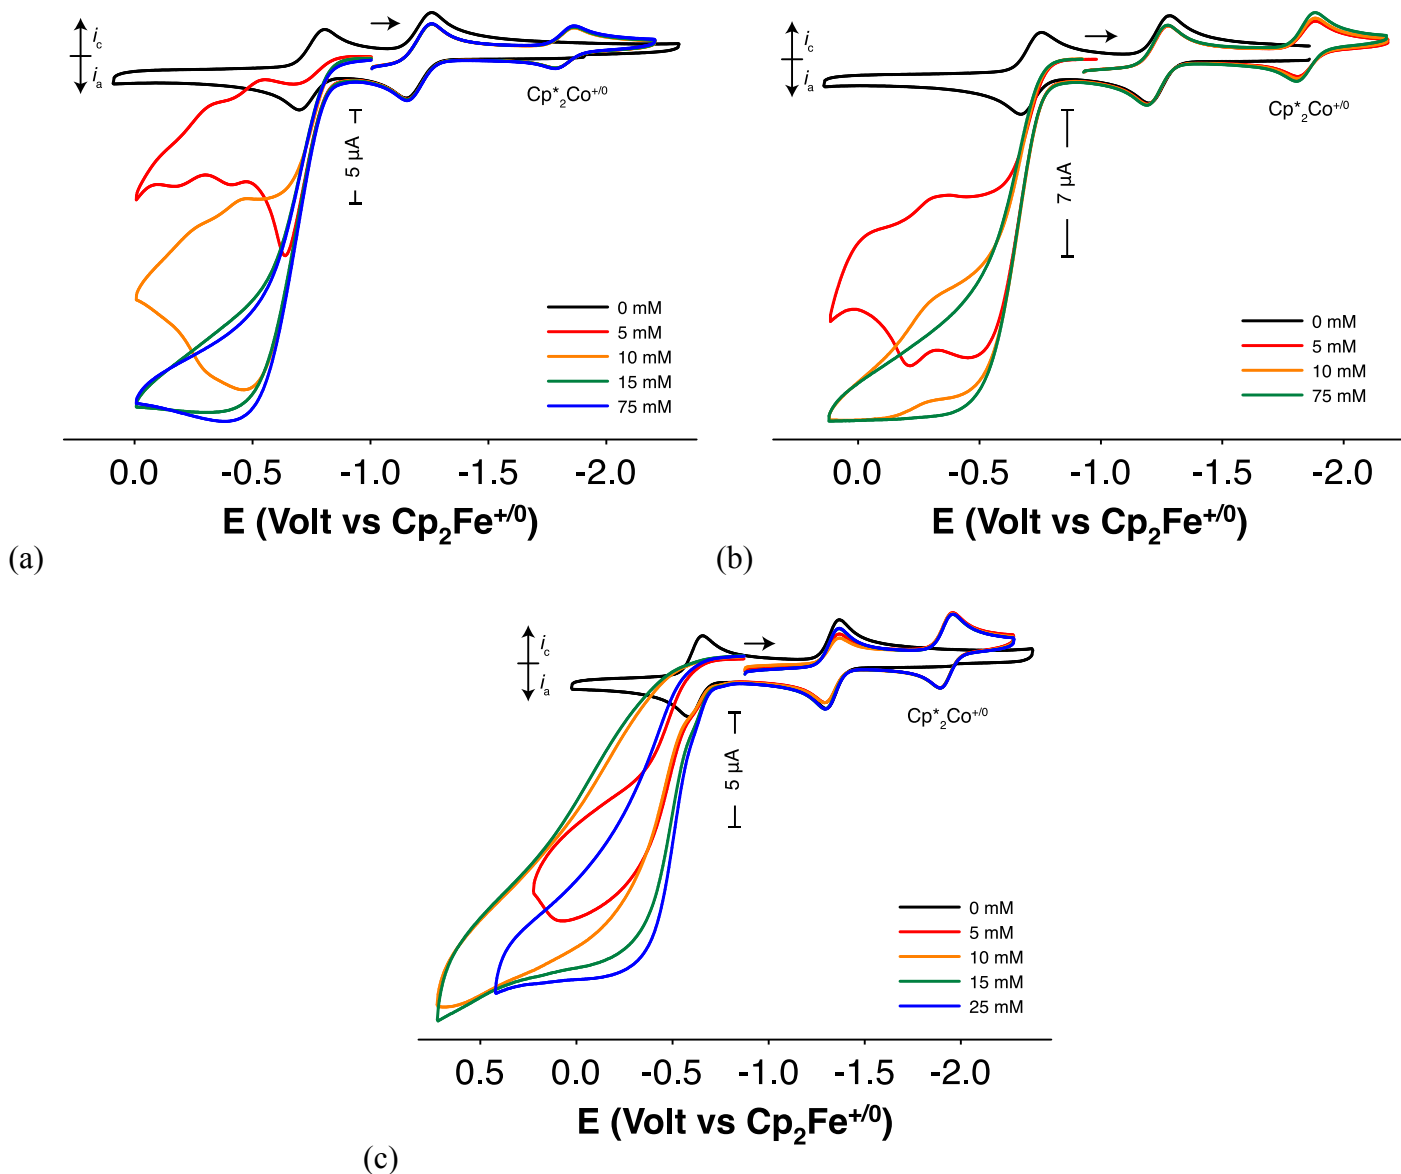

**Figure S10.** Cyclic voltammograms of a THF solution of  $\text{Ni}(\text{PCy}_2\text{NBn}_2)_2$  upon addition of  $\text{nBuNH}_2$  using (a)  $[\text{nBu}_4\text{N}][\text{BF}_4]$ , (b)  $[\text{nBu}_4\text{N}][\text{PF}_6]$ , and (c)  $[\text{nBu}_4\text{N}][\text{B}(\text{C}_6\text{F}_5)_4]$  as the supporting electrolyte. Conditions: 0.8 mM  $[\text{Ni}]$ , 0.2 M electrolyte, 250 mV/s. Potentials are referenced to  $\text{Cp}_2\text{Fe}^{+/0}$ .

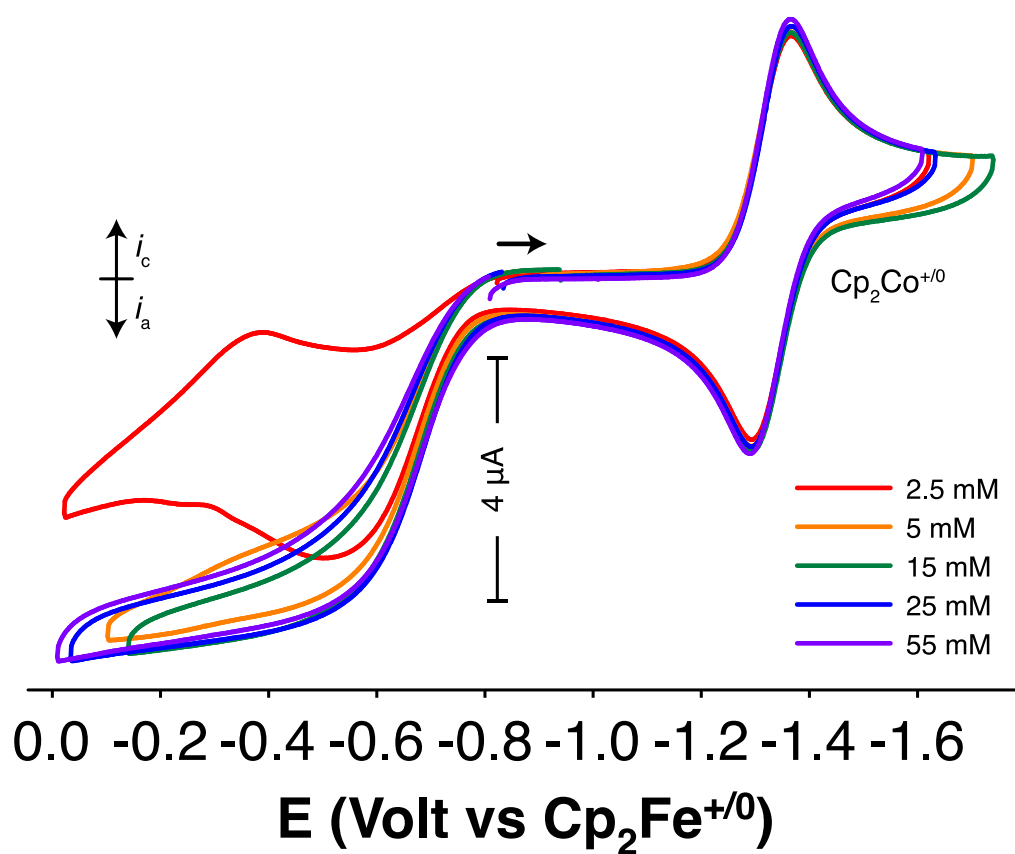

**Figure S11.** Cyclic voltammograms of a PhCN solution of  $\text{Ni}(\text{PCy}_2\text{NBn}_2)_2$  upon addition of  $n\text{BuNH}_2$  using  $[n\text{Bu}_4\text{N}][\text{PF}_6]$  as the supporting electrolyte. Conditions: 0.8 mM [Ni], 0.2 M electrolyte, 250 mV/s. Potentials are referenced to  $\text{Cp}_2\text{Fe}^{+/0}$ .

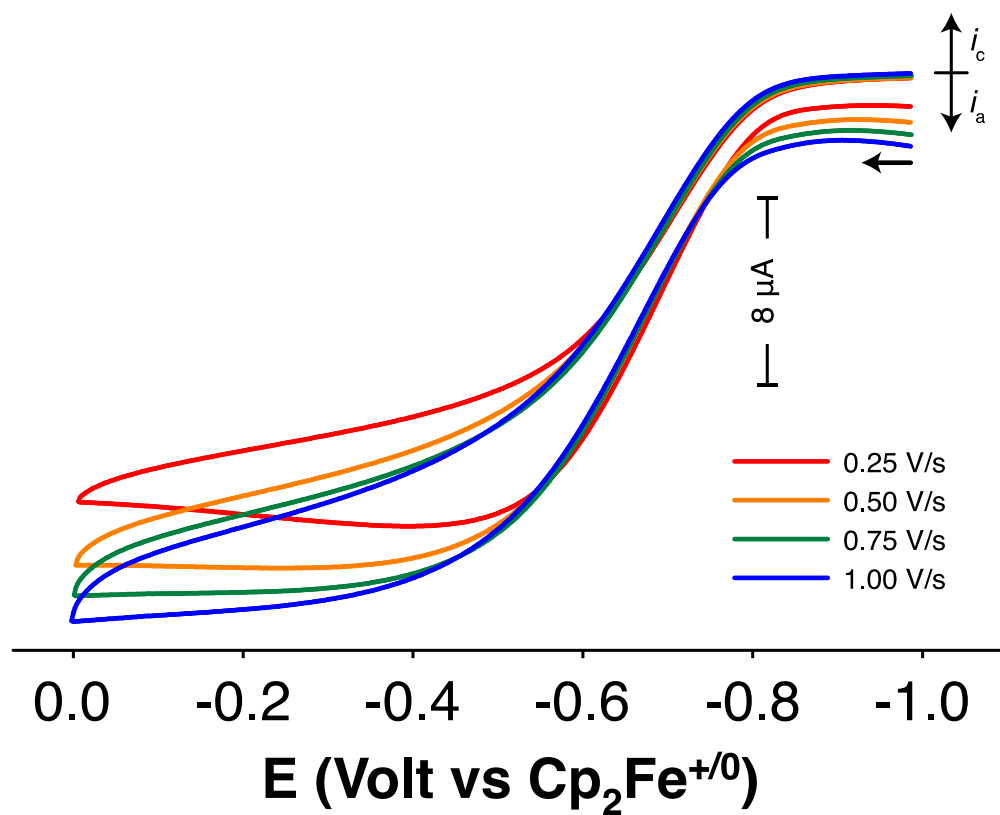

**Figure S12.** Cyclic voltammograms of a THF solution of  $\text{Ni}(\text{P}^{\text{Cy}_2\text{NBn}_2})_2$  as a function of scan rate. Conditions: 0.8 mM  $[\text{Ni}]$ , 0.2 M  $[\text{nBu}_4\text{N}][\text{BF}_4]$ , 90 mM  $\text{nBuNH}_2$ . Potentials are referenced to  $\text{Cp}_2\text{Fe}^{+/0}$ .

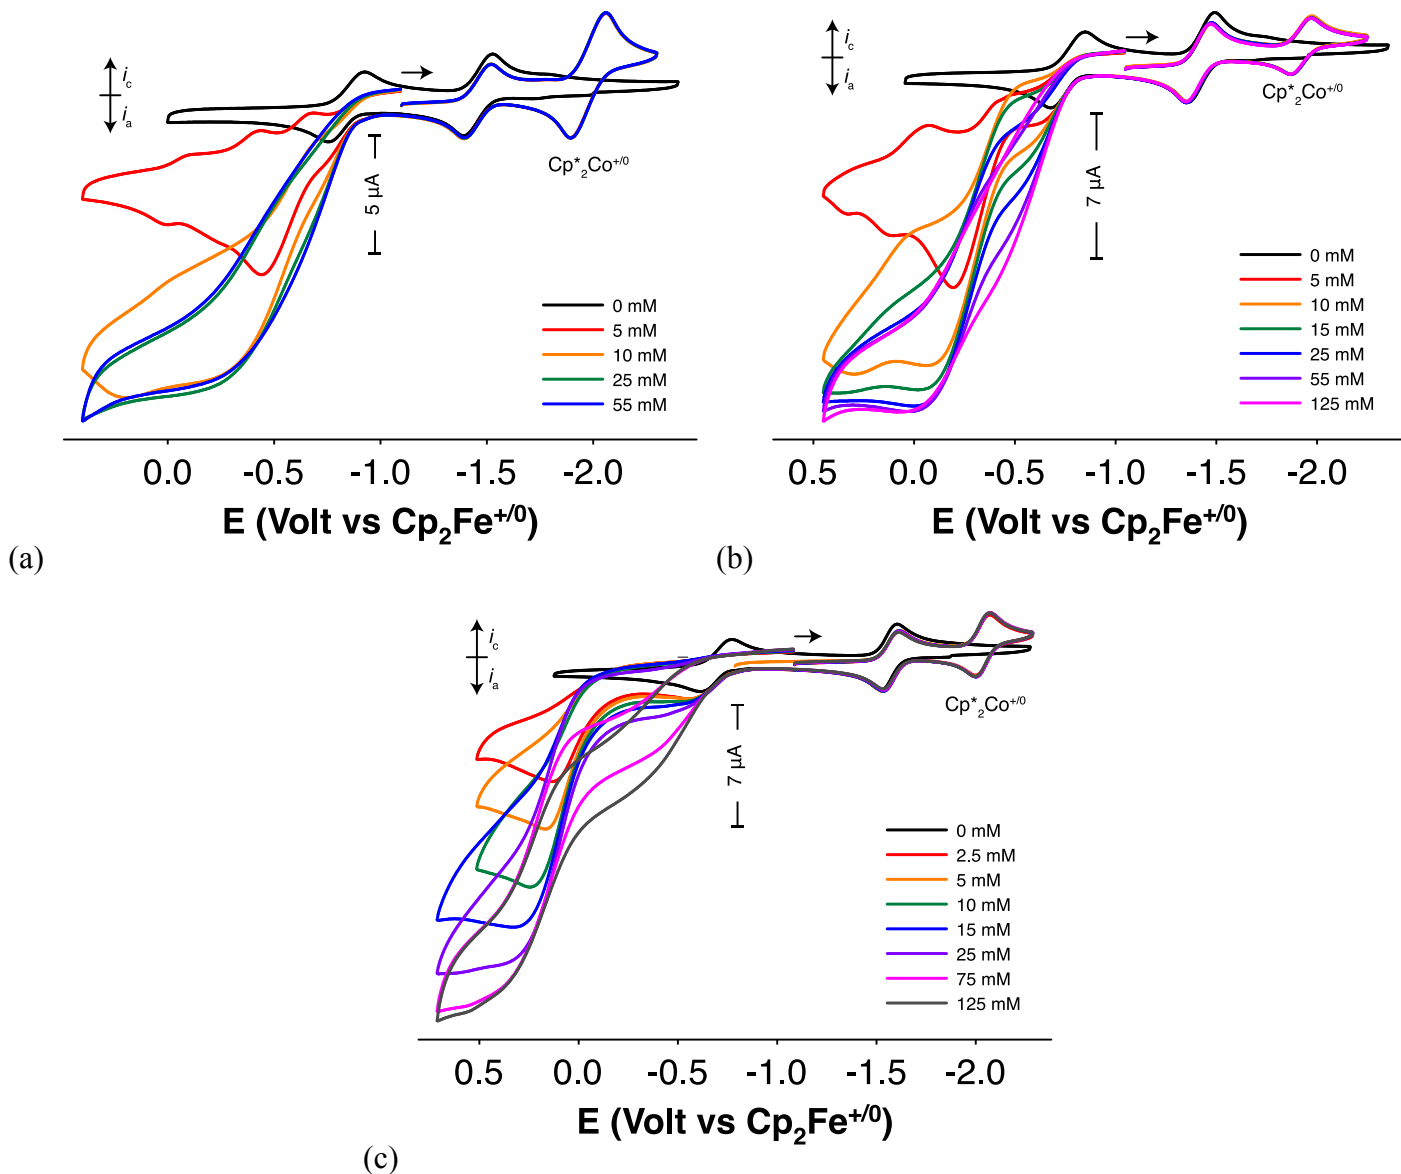

**Figure S13.** Cyclic voltammograms of a fluorobenzene solution of  $\text{Ni}(\text{PCy}_2\text{N}^t\text{Bu}_2)_2$  upon addition of  $n\text{BuNH}_2$  using (a)  $[\text{nBu}_4\text{N}][\text{BF}_4]$ , (b)  $[\text{nBu}_4\text{N}][\text{PF}_6]$ , and (c)  $[\text{nBu}_4\text{N}][\text{B}(\text{C}_6\text{F}_5)_4]$  as the supporting electrolyte. Conditions: 0.8 mM  $[\text{Ni}]$ , 0.2 M electrolyte, 250 mV/s. Potentials are referenced to  $\text{Cp}_2\text{Fe}^{+/0}$ .

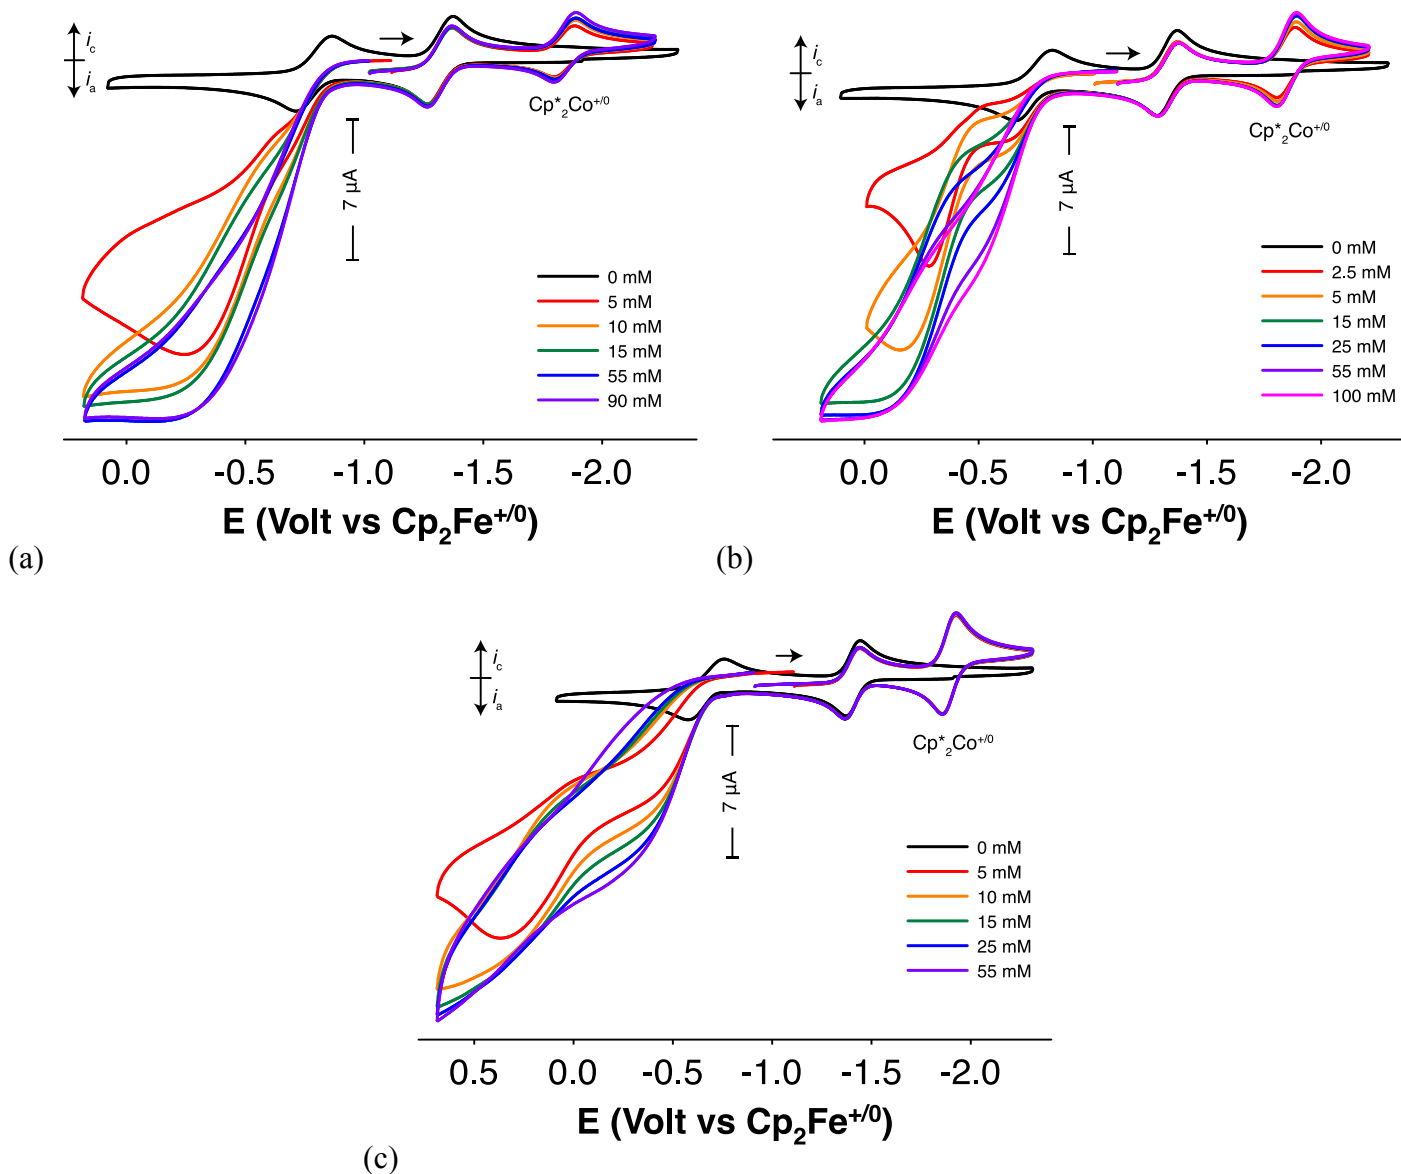

**Figure S14.** Cyclic voltammograms of a THF solution of  $\text{Ni}(\text{PCy}_2\text{N}^t\text{Bu}_2)_2$  upon addition of  $n\text{BuNH}_2$  using (a)  $[n\text{Bu}_4\text{N}][\text{BF}_4]$ , (b)  $[n\text{Bu}_4\text{N}][\text{PF}_6]$ , and (c)  $[n\text{Bu}_4\text{N}][\text{B}(\text{C}_6\text{F}_5)_4]$  as the supporting electrolyte. Conditions: 0.8 mM  $[\text{Ni}]$ , 0.2 M electrolyte, 250 mV/s. Potentials are referenced to  $\text{Cp}_2\text{Fe}^{+/0}$ .

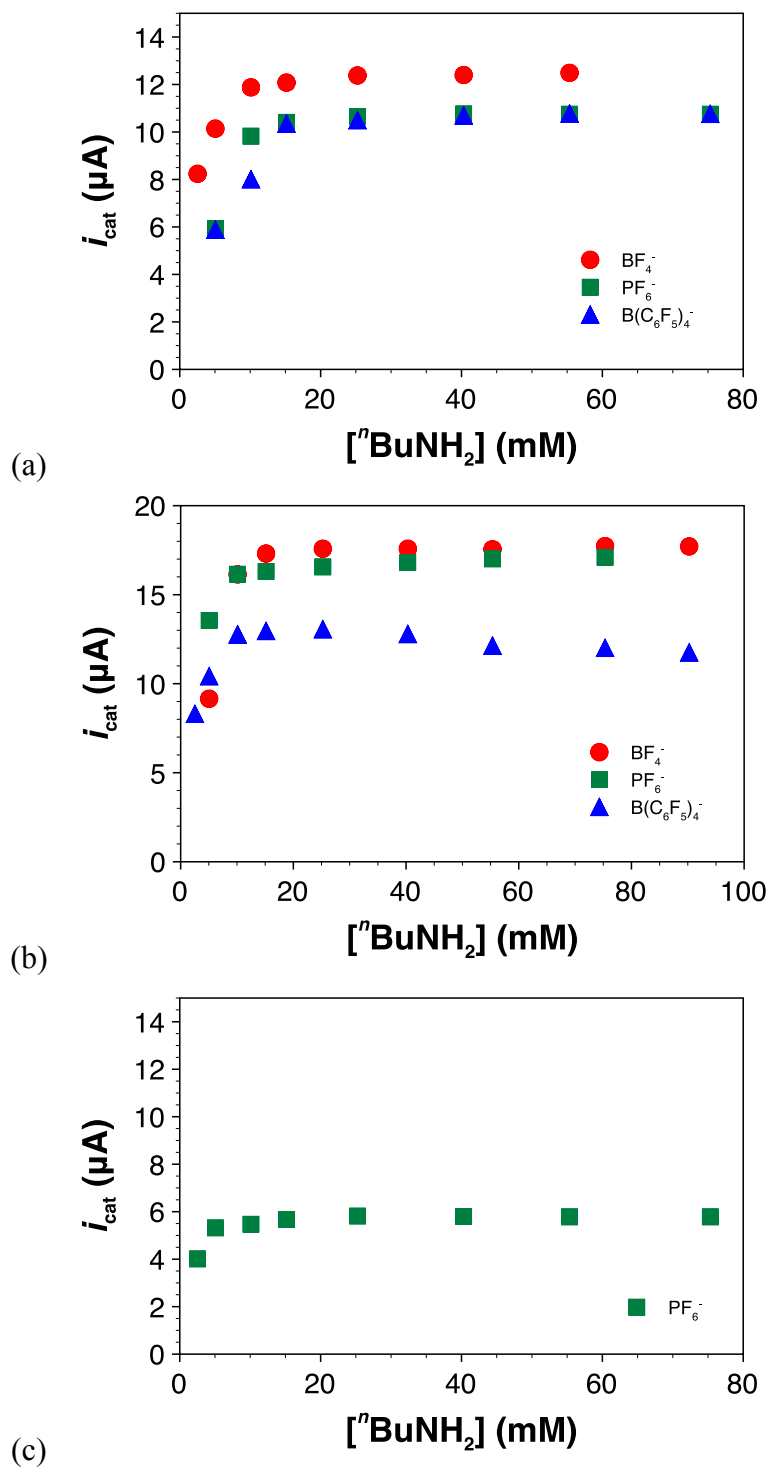

**Figure S15.** Plot of the catalytic current ( $i_{\text{cat}}$ ) of  $\text{Ni}(\text{P}^{\text{Cy}}_2\text{N}^{\text{Bn}}_2)_2$  versus the concentration of  $n\text{BuNH}_2$  in (a) fluorobenzene, (b) THF, and (c) benzonitrile solution using  $[n\text{Bu}_4\text{N}][\text{BF}_4]$  (red circle),  $[n\text{Bu}_4\text{N}][\text{PF}_6]$  (green square), and  $[n\text{Bu}_4\text{N}][\text{B}(\text{C}_6\text{F}_5)_4]$  (blue triangle) as the supporting electrolyte. Conditions: 0.8 mM  $[\text{Ni}]$ , 0.2 M electrolyte, 250 mV/s.

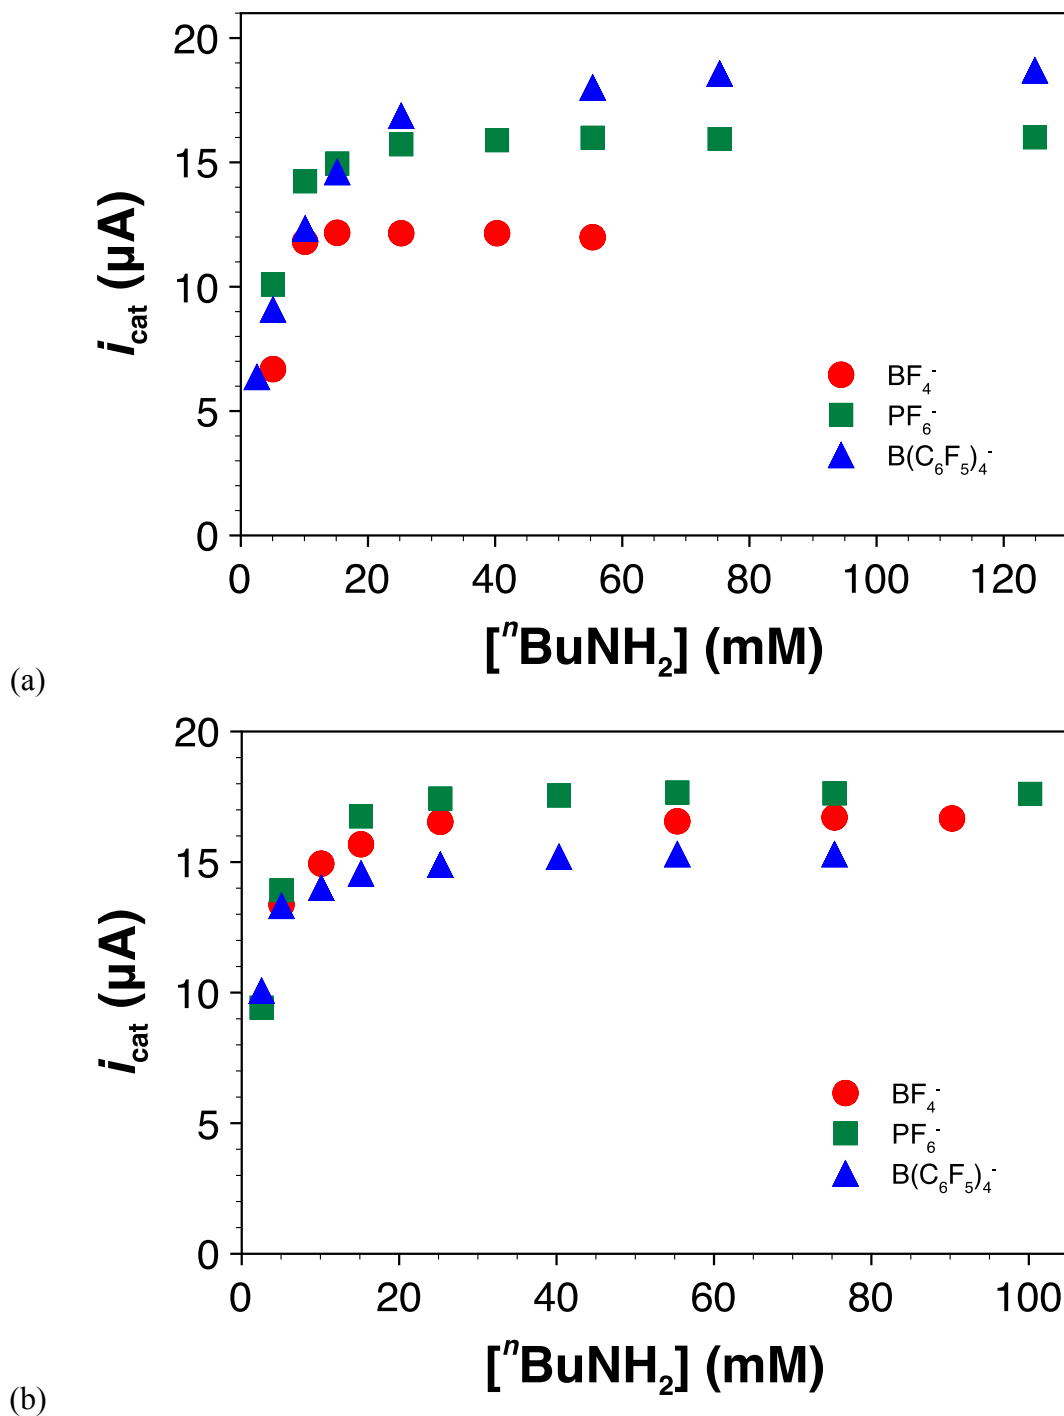

**Figure S16.** Plot of the catalytic current ( $i_{\text{cat}}$ ) of  $\text{Ni}(\text{PCy}_2\text{N}^t\text{Bu}_2)_2$  versus the concentration of  $^n\text{BuNH}_2$  in (a) fluorobenzene and (b) THF solution using  $[^n\text{Bu}_4\text{N}][\text{BF}_4]$  (red circle),  $[^n\text{Bu}_4\text{N}][\text{PF}_6]$  (green square), and  $[^n\text{Bu}_4\text{N}][\text{B}(\text{C}_6\text{F}_5)_4]$  (blue triangle) as the supporting electrolyte. Conditions: 0.8 mM [Ni], 0.2 M electrolyte, 250 mV/s.

## References:

---

1. M. O'Hagan, W. J. Shaw, S. Raugei, S. Chen, J. Y. Yang, U. J. Kilgore, D. L. DuBois, and R. M. Bullock, *J. Am. Chem. Soc.*, 2011, **133**, 14301–14312.
2. J. Y. Yang, S. Chen, W. G. Dougherty, W. S. Kassel, R. M. Bullock, D. L. DuBois, S. Raugei, R. Rousseau, M. Dupuis, and M. R. DuBois, *Chem. Commun.*, 2010, **46**, 8618.
